# Supplementary material for: A Bayesian Adaptive Design in Cancer Phase I Trials Using Dose Combinations in the Presence of a Baseline Covariate
Source: Hindawi journal article supplement (doi:10.1155/2018/8654173), 2018-11-01
Supplement: f1 [file 8654173.f1.pdf]

## 6. Supplementary Material

**Table S1:** Operating characteristics summarizing trial safety for designs using a covariate (WC), ignoring the covariate (IC), and parallel trials (PT) considering continuous dose combinations,  $\theta = 0.33$

| Scenario | True model | Design | Average % DLTs<br>(% Trials: DLT rate $< \theta - 0.1$ ;<br>DLT rate $> \theta + 0.1$ ) |                    |                    |
|----------|------------|--------|-----------------------------------------------------------------------------------------|--------------------|--------------------|
|          |            |        | Overall                                                                                 | Z = 0              | Z = 1              |
|          |            |        |                                                                                         |                    |                    |
| (a)      | Probit     | WC     | 30.61 (5.0 ; 0.2)                                                                       | 20.62 (64.3 ; 0.0) | 40.59 (0.0 ; 37.6) |
|          |            | IC     | 30.65 (6.7 ; 0.4)                                                                       | 7.63 (98.3 ; 0.0)  | 53.67 (0.0 ; 90.8) |
|          |            | PT     | -                                                                                       | 22.59 (50.8 ; 0.0) | 30.28 (6.2 ; 1.3)  |
|          | Normal     | WC     | 30.17 (8.0 ; 0.1)                                                                       | 22.10 (54.2 ; 0.2) | 38.24 (0.7 ; 27.4) |
|          |            | IC     | 29.67 (9.7 ; 0.4)                                                                       | 16.66 (79.1 ; 0.1) | 42.68 (0.4 ; 50.4) |
|          |            | PT     | -                                                                                       | 21.40 (59.9 ; 0.0) | 29.45 (10.9 ; 1.8) |
|          | CLog-log   | WC     | 30.47 (5.1 ; 0.2)                                                                       | 21.52 (58.7 ; 0.2) | 39.42 (0.1 ; 31.5) |
|          |            | IC     | 30.29 (7.6 ; 0.2)                                                                       | 11.75 (94.4 ; 0.0) | 48.84 (0.1 ; 76.3) |
|          |            | PT     | -                                                                                       | 22.13 (54.7 ; 0.0) | 29.97 (9.0 ; 1.4)  |
| (b)      | Probit     | WC     | 24.79 (39.8 ; 0.0)                                                                      | 19.61 (73.4 ; 0.0) | 29.97 (8.3 ; 1.5)  |
|          |            | IC     | 26.15 (26.6 ; 0.0)                                                                      | 15.99 (80.8 ; 0.0) | 36.31 (3.7 ; 21.6) |
|          |            | PT     | -                                                                                       | 17.54 (90 ; 0.0)   | 20.03 (70.6 ; 0.0) |
|          | Normal     | WC     | 23.90 (51.0 ; 0.0)                                                                      | 19.44 (71.2 ; 0.0) | 28.37 (18.1 ; 1.9) |
|          |            | IC     | 25.11 (40.7 ; 0.0)                                                                      | 19.19 (66.5 ; 0.2) | 31.02 (15.5 ; 9.7) |
|          |            | PT     | -                                                                                       | 16.58 (90.5 ; 0.0) | 19.11 (78.0 ; 0.0) |
|          | CLog-log   | WC     | 24.42 (46.0 ; 0.0)                                                                      | 19.29 (74.2 ; 0.0) | 29.55 (11.0 ; 2.1) |
|          |            | IC     | 25.62 (34.8 ; 0.0)                                                                      | 17.83 (75.5 ; 0.0) | 33.41 (9.1 ; 13.9) |
|          |            | PT     | -                                                                                       | 16.96 (91.6 ; 0.0) | 19.66 (73.5 ; 0.0) |
| (c)      | Probit     | WC     | 24.17 (46.4 ; 0.0)                                                                      | 12.30 (97.8 ; 0.0) | 36.05 (0.3 ; 14.5) |
|          |            | IC     | 26.35 (30.6 ; 0.0)                                                                      | 3.69 (100 ; 0.0)   | 49.01 (0.0 ; 78.0) |
|          |            | PT     | -                                                                                       | 15.21 (97.8 ; 0.0) | 23.13 (48.3 ; 0.0) |
|          | Normal     | WC     | 24.25 (47.7 ; 0.0)                                                                      | 14.63 (90.8 ; 0.0) | 33.87 (4.2 ; 10.9) |
|          |            | IC     | 24.88 (43.0 ; 0.0)                                                                      | 10.37 (95.1 ; 0.0) | 39.39 (2.0 ; 35.2) |
|          |            | PT     | -                                                                                       | 14.49 (96.6 ; 0.0) | 22.13 (55.0 ; 0.0) |
|          | CLog-log   | WC     | 24.16 (46.8 ; 0.0)                                                                      | 13.53 (95.2 ; 0.0) | 34.80 (1.7 ; 11.6) |
|          |            | IC     | 25.84 (33.1 ; 0.0)                                                                      | 7.23 (99.5 ; 0.0)  | 44.46 (0.2 ; 59.7) |
|          |            | PT     | -                                                                                       | 14.96 (96.3 ; 0.0) | 22.95 (48.2 ; 0.0) |
| (d)      | Probit     | WC     | 16.55 (99.7 ; 0.0)                                                                      | 4.12 (100.0 ; 0.0) | 28.98 (7.0 ; 0.1)  |
|          |            | IC     | 22.90 (60.0 ; 0.0)                                                                      | 0.60 (100.0 ; 0.0) | 45.20 (0.0 ; 62.3) |
|          |            | PT     | -                                                                                       | 7.27 (100.0 ; 0.0) | 15.44 (95.2 ; 0.0) |
|          | Normal     | WC     | 17.24 (97.0 ; 0.0)                                                                      | 6.04 (100.0 ; 0.0) | 28.44 (14.2 ; 1.0) |
|          |            | IC     | 21.24 (74.8 ; 0.0)                                                                      | 3.44 (100.0 ; 0.0) | 39.05 (0.3 ; 30.5) |
|          |            | PT     | -                                                                                       | 6.44 (100.0 ; 0.0) | 14.84 (95.6 ; 0.0) |
|          | CLog-log   | WC     | 16.60 (99.3 ; 0.0)                                                                      | 4.86 (100.0 ; 0.0) | 28.34 (11.7 ; 0.2) |
|          |            | IC     | 22.36 (65.5 ; 0.0)                                                                      | 1.78 (100.0 ; 0.0) | 42.94 (0.3 ; 51.6) |
|          |            | PT     | -                                                                                       | 7.08 (100.0 ; 0.0) | 14.62 (97.2 ; 0.0) |

*Abbreviation:* CLog-log, complementary log-log. Scenario  $(\rho_{000}, \rho_{100}, \rho_{101}, \rho_{010}, \eta)$ : (a) (0.01, 0.4, 0.8, 0.4, 10), (b) (0.005, 0.1, 0.2, 0.1, 10), (c) (0.005, 0.2, 0.7, 0.01, 10), (d)  $(10^{-4}, 10^{-3}, 0.05, 10^{-3}, 10)$ .

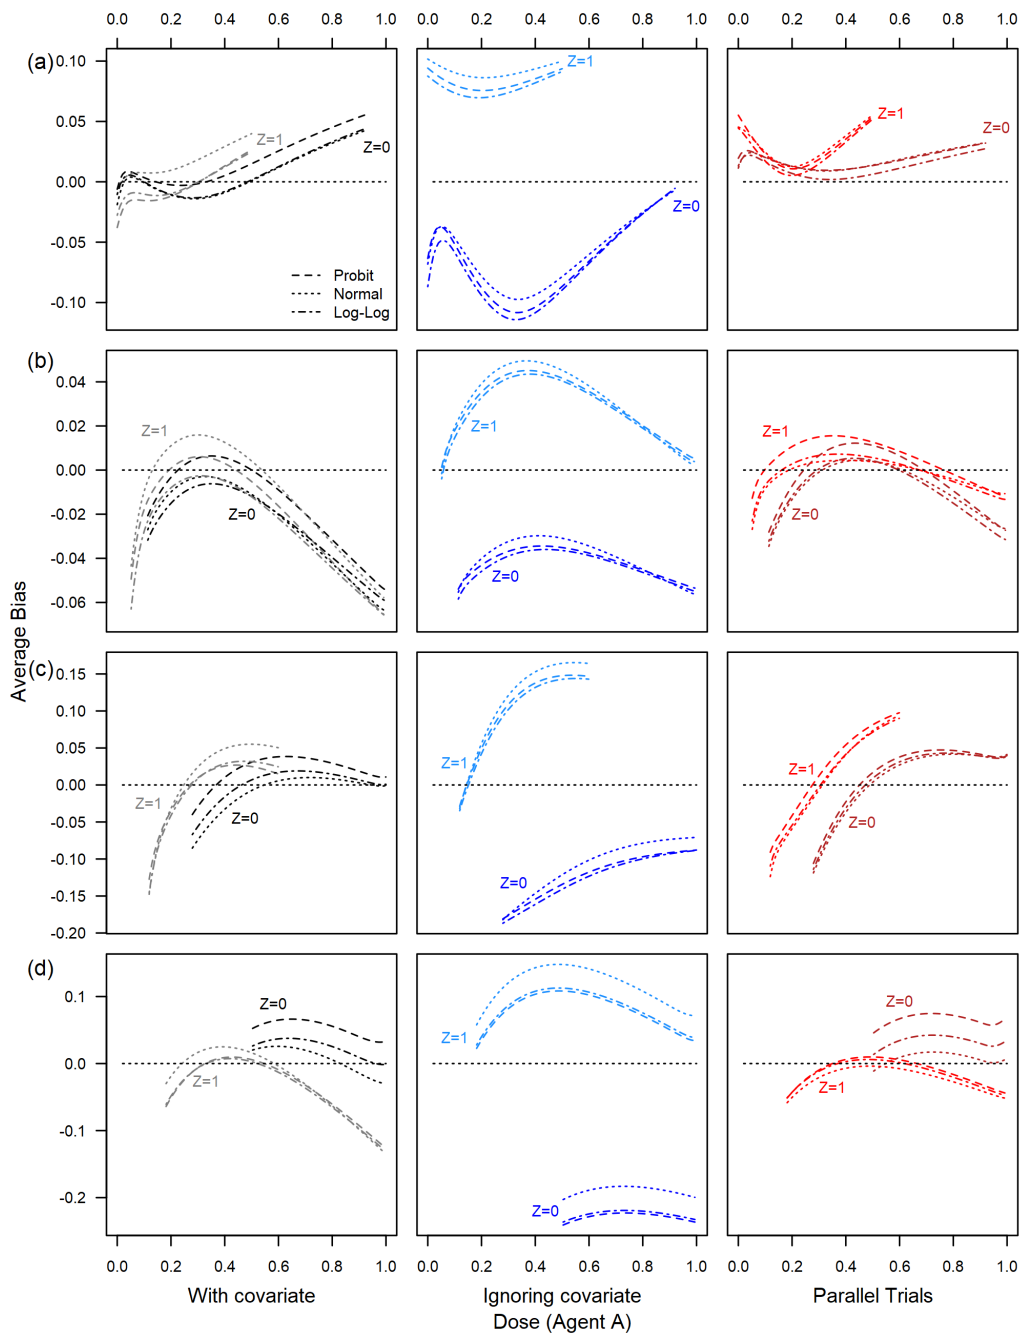

**Figure S1:** Pointwise average relative minimum distance from the true MTD curve to the estimated MTD curve with designs using a covariate (WC), ignoring the covariate (IC), and parallel trials (PT) under scenarios (a)-(d)

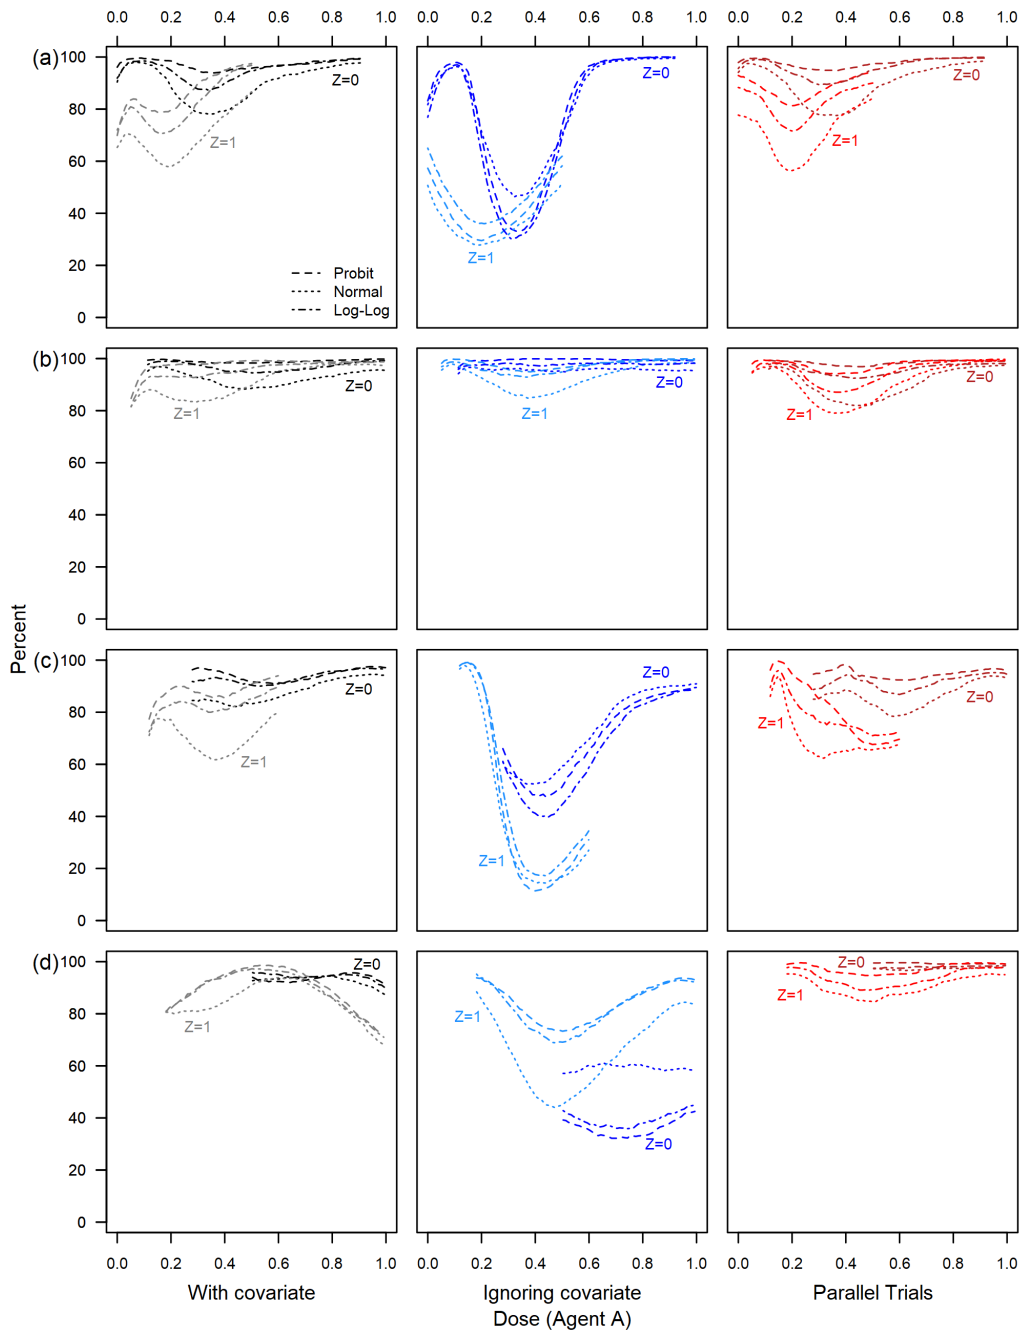

**Figure S2:** Pointwise percent of MTD recommendation for  $p = 0.2$  with designs using a covariate (WC), ignoring the covariate (IC), and parallel trials (PT) under scenarios (a)-(d)
